# Supplementary material for: Changes in Physical Performance among Community-Dwelling Older Adults in Six Years
Source: MDPI journal article supplement (doi:10.3390/ijerph20085579), 2023-04-19
Supplement: s1 [file s1]

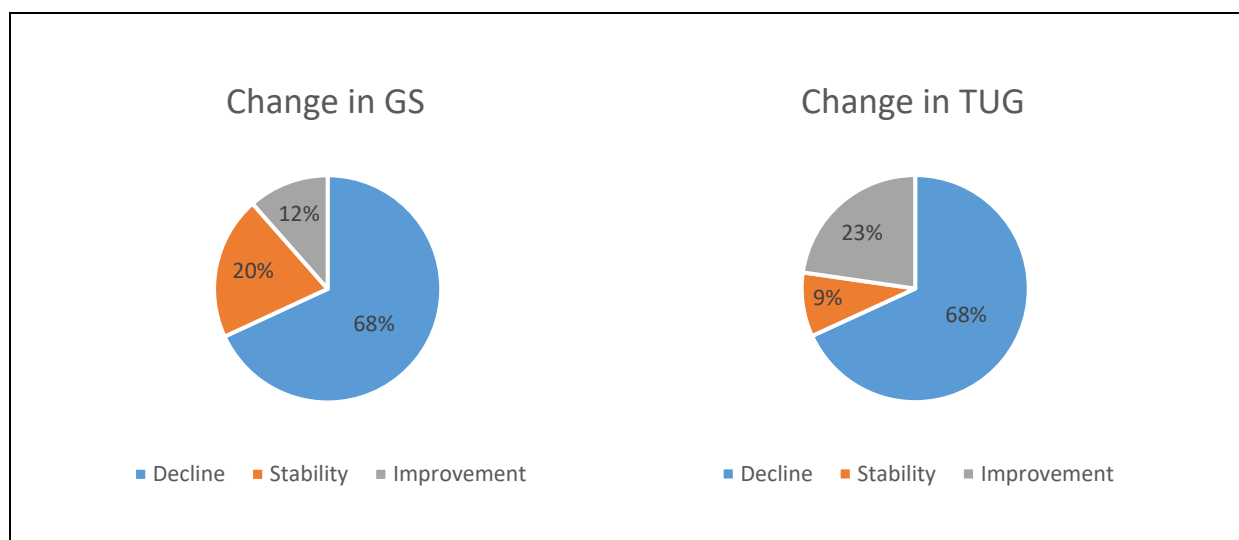

**Figure S1:** Change in physical performance tests - Gait Speed (GS) and Timed Up and Go (TUG) - from 2014 to 2019-20 of the older people in the COMO VAI? study.

**Table S1:** Mean Gait Speed (GS) in 2014 and 2019 according to sociodemographic, behavioral and health-related variables of the older adults in the COMO VAI? study. N=476. Pelotas, Brazil.

| Variables                                                                | GS in 2014                                 | GS in 2019                                 |
|--------------------------------------------------------------------------|--------------------------------------------|--------------------------------------------|
|                                                                          | <i>p-value<sup>a</sup></i><br>Mean (95%CI) | <i>p-value<sup>a</sup></i><br>Mean (95%CI) |
| <b>Sex</b>                                                               | <i>p=0.001</i>                             | <i>p=0.025</i>                             |
| Male                                                                     | 1.16 (1.12; 1.21)                          | 0.90 (0.85; 0.95)                          |
| Female                                                                   | 1.03 (0.99; 1.06)                          | 0.83 (0.80; 0.8                            |
| <b>Age (completed years)</b>                                             | <i>p&lt;0.001</i>                          | <i>p&lt;0.001</i>                          |
| 60-69                                                                    | 1.13 (1.09; 1.16)                          | 0.91 (0.88; 0.95)                          |
| 70-79                                                                    | 1.03 (0.98; 1.08)                          | 0.80 (0.75; 0.85)                          |
| 80+                                                                      | 0.84 (0.74; 0.94)                          | 0.60 (0.50; 0.70)                          |
| <b>Skin color</b>                                                        | <i>p=0.99</i>                              | <i>p=0.69</i>                              |
| White                                                                    | 1.08 (1.05; 1.11)                          | 0.86 (0.83; 0.89)                          |
| Other than white                                                         | 1.08 (1.01; 1.14)                          | 0.84 (0.78; 0.91)                          |
| <b>Marital status</b>                                                    | <i>p=0.08</i>                              | <i>p=0.11</i>                              |
| Married/with a partner                                                   | 1.10 (1.07; 1.14)                          | 0.87 (0.83; 0.91)                          |
| Without a partner/separated                                              | 1.06 (0.99; 1.13)                          | 0.79 (0.72; 0.85)                          |
| Widow(er)                                                                | 1.03 (0.97; 1.08)                          | 0.86 (0.81; 0.92)                          |
| <b>Economic level<sup>b</sup></b>                                        | <i>p&lt;0.01</i>                           | <i>p=0.51</i>                              |
| A/B                                                                      | 1.14 (1.09; 1.19)                          | 0.88 (0.83; 0.93)                          |
| C                                                                        | 1.05 (1.01; 1.08)                          | 0.84 (0.80; 0.88)                          |
| D/E                                                                      | 1.02 (0.93; 1.11)                          | 0.85 (0.76; 0.95)                          |
| <b>Education level (completed years)</b>                                 | <i>p&lt;0.001</i>                          | <i>p=0.016</i>                             |
| None                                                                     | 1.00 (0.91; 1.08)                          | 0.78 (0.70; 0.87)                          |
| 1-7                                                                      | 1.03 (0.99; 1.06)                          | 0.83 (0.80; 0.87)                          |
| ≥8                                                                       | 1.20 (1.14; 1.25)                          | 0.92 (0.87; 0.97)                          |
| <b>Current work situation</b>                                            | <i>p=0.26</i>                              | <i>p=0.30</i>                              |
| No (unemployed)                                                          | 1.07 (1.04; 1.10)                          | 0.85 (0.82; 0.88)                          |
| Yes (employed)                                                           | 1.11 (1.05; 1;17)                          | 0.88 (0.82; 0.94)                          |
| <b>Diet quality<sup>c</sup></b>                                          | <i>p=0.51</i>                              | <i>p=0.22</i>                              |
| Low                                                                      | 1.05 (1.00; 1.10)                          | 0.82 (0.77; 0.87)                          |
| Average                                                                  | 1.09 (1.04; 1.13)                          | 0.87 (0.82; 0.91)                          |
| High                                                                     | 1.09 (1.04; 1.14)                          | 0.88 (0.83; 0.93)                          |
| <b>Leisure-time physical activity<br/>(&gt;150 min/week)<sup>d</sup></b> | <i>p=0.06</i>                              | <i>p=0.14</i>                              |
| No                                                                       | 1.06 (1.03; 1.09)                          | 0.84 (0.81; 0.87)                          |

|                                        |                   |                   |
|----------------------------------------|-------------------|-------------------|
| Yes                                    | 1.13 (1.07; 1.19) | 0.90 (0.84; 0.96) |
| <b>Smoking</b>                         | <i>p=0.37</i>     | <i>p=0.78</i>     |
| Not a smoker                           | 1.06 (1.02; 1.10) | 0.85 (0.81; 0.88) |
| Smoker                                 | 1.10 (1.02; 1.18) | 0.86 (0.78; 0.93) |
| Former smoker                          | 1.10 (1.05; 1.15) | 0.87 (0.82; 0.92) |
| <b>Alcohol consumption<sup>c</sup></b> | <i>p=0.027</i>    | <i>p=0.79</i>     |
| No                                     | 1.06 (1.03; 1.09) | 0.85 (0.82; 0.88) |
| Yes                                    | 1.13 (1.08; 1.19) | 0.86 (0.81; 0.92) |
| <b>Multimorbidity</b>                  | <i>p=0.37</i>     | <i>p=0.20</i>     |
| Up to 4 diseases                       | 1.10 (1.05; 1.15) | 0.88 (0.83; 0.93) |
| 5 or more diseases                     | 1.07 (1.03; 1.10) | 0.84 (0.81; 0.88) |
| <b>Depression<sup>f</sup></b>          | <i>p=0.003</i>    | <i>p=0.021</i>    |
| No                                     | 1.09 (1.06; 1.12) | 0.87 (0.84; 0.90) |
| Yes                                    | 0.97 (0.90; 1.05) | 0.78 (0.70; 0.85) |
| <b>Polypharmacy<sup>g</sup></b>        | <i>p&lt;0.001</i> | <i>p=0.026</i>    |
| No                                     | 1.00 (0.95; 1.05) | 0.81 (0.76; 0.86) |
| Yes                                    | 1.11 (1.08; 1.14) | 0.88 (0.84; 0.91) |
| <b>Body Mass Index<sup>h</sup></b>     | <i>p=0.32</i>     | <i>p=0.92</i>     |
| Low weight                             | 1.05 (0.94; 1.16) | 0.87 (0.76; 0.98) |
| Normal                                 | 1.11 (1.06; 1.16) | 0.86 (0.81; 0.91) |
| Overweight                             | 1.06 (1.03; 1.10) | 0.85 (0.82; 0.88) |

<sup>a</sup> p value obtained through adjusted linear regression including variables according to hierarchical levels: 1<sup>st</sup> Level: sex, age, skin color, marital status, economic level, education, work status; 2<sup>nd</sup> Level: diet quality, physical activity, smoking, alcohol consumption; 3<sup>rd</sup> Level: multimorbidity, depression, polypharmacy and nutritional status.

<sup>b</sup> according to *Associação Brasileira de Empresas de Pesquisa* (ABEP)[21]: category A/B indicating higher socioeconomic status;

<sup>c</sup> assessed using the Diet Quality Index for the Elderly (*Índice de Qualidade da dieta do idoso - IDQ-I*)[22];

<sup>d</sup> assessed by the International Physical Activity Questionnaire (IPAQ)[23];

<sup>e</sup> alcohol consumption in the last month;

<sup>f</sup> according to the Geriatric Depressive Scale (GDS-10)[25,26];

<sup>g</sup> continuous use of five or more medications[27];

<sup>h</sup> cutoffs recommended by Lipschitz et al[28].

**Table S2:** Mean Timed Up and Go (TUG) in 2014 and 2019 according to sociodemographic, behavioral and health-related variables of the older adults in the COMO VAI? study. N=476. Pelotas, Brazil.

| Variables                                                            | TUG in 2014                | TUG in 2019                |
|----------------------------------------------------------------------|----------------------------|----------------------------|
|                                                                      | <i>p-value<sup>a</sup></i> | <i>p-value<sup>a</sup></i> |
|                                                                      | Mean (95%CI)               | Mean (95%CI)               |
| Sample                                                               | <i>Mean TUG 2014</i>       | <i>Mean TUG 2019</i>       |
| <b>Sex</b>                                                           | <i>p=0.018</i>             | <i>p=0.21</i>              |
| Male                                                                 | 9.24 (7.95; 10.52)         | 11.86 (10.57; 13.14)       |
| Female                                                               | 11.19 (10.25; 12.13)       | 12.90 (11.97; 13.84)       |
| <b>Age (completed years)</b>                                         | <i>p&lt;0.001</i>          | <i>p&lt;0.001</i>          |
| 60-69                                                                | 9.80 (8.86; 10.74)         | 10.78 (9.84; 11.73)        |
| 70-79                                                                | 10.51 (9.22; 11.81)        | 13.14 (11.85; 14.44)       |
| 80+                                                                  | 16.13 (13.42; 18.85)       | 24.08 (21.36; 26.80)       |
| <b>Skin color</b>                                                    | <i>p=0.40</i>              | <i>p=0.55</i>              |
| White                                                                | 10.68 (9.85; 11.52)        | 12.48 (11.65; 13.32)       |
| Other than white                                                     | 9.83 (8.05; 11.62)         | 13.09 (11.31; 14.87)       |
| <b>Marital status</b>                                                | <i>p=0.13</i>              | <i>p=0.42</i>              |
| Married/with a partner                                               | 9.91 (8.91; 10.91)         | 12.21 (11.21; 13.20)       |
| Without a partner/Separated                                          | 10.78 (8.83; 12.73)        | 13.64 (11.69; 15.59)       |
| Widow(er)                                                            | 11.86 (10.29; 13.43)       | 12.88 (11.32; 14.45)       |
| <b>Economic level<sup>b</sup></b>                                    | <i>p=0.029</i>             | <i>p=0.60</i>              |
| A/B                                                                  | 11.85 (10.57; 13.13)       | 12.29 (11.01; 13.57)       |
| C                                                                    | 9.68 (8.68; 10.67)         | 12.91 (11.91; 13.91)       |
| D/E                                                                  | 9.19 (6.86; 11.52)         | 11.87 (9.54; 14.20)        |
| <b>Education level (completed years)</b>                             | <i>p=0.09</i>              | <i>p&lt;0.001</i>          |
| None                                                                 | 12.53 (10.31; 14.75)       | 16.40 (14.18; 18.62)       |
| 1-7                                                                  | 10.59 (9.60; 11.58)        | 12.82 (11.83; 13.80)       |
| ≥8                                                                   | 9.60 (8.27; 10.94)         | 10.61 (9.28; 11.95)        |
| <b>Current work situation</b>                                        | <i>p=0.71</i>              | <i>p=0.25</i>              |
| No (unemployed)                                                      | 10.46 (9.58; 11.33)        | 12.75 (11.87; 13.62)       |
| Yes (employed)                                                       | 10.10 (8.47; 11.72)        | 11.64 (10.02; 13.27)       |
| <b>Diet quality<sup>c</sup></b>                                      | <i>p=0.82</i>              | <i>p=0.67</i>              |
| Low                                                                  | 10.78 (9.43; 12.12)        | 12.98 (11.64; 14.33)       |
| Average                                                              | 10.22 (9.05; 11.39)        | 12.61 (11.35; 13.88)       |
| Low                                                                  | 10.32 (9.04; 11.61)        | 12.14 (10.85; 13.43)       |
| <b>Leisure-time physical activity (&gt;150 min/week)<sup>d</sup></b> | <i>p=0.63</i>              | <i>p=0.039</i>             |

|                                        |                      |                      |
|----------------------------------------|----------------------|----------------------|
| No                                     | 10.35 (9.54; 11.16)  | 13.02 (12.21; 13.83) |
| Yes                                    | 10.81 (9.15; 12.46)  | 11.07 (9.42; 12.73)  |
| <b>Smoking</b>                         | <i>p=0.10</i>        | <i>p=0.21</i>        |
| Not a smoker                           | 11.29 (10.26; 12.32) | 13.22 (12.19; 14.25) |
| Smoker                                 | 9.63 (7.43; 11.82)   | 12.04 (9.85; 14.23)  |
| Former smoker                          | 9.56 (8.21; 10.91)   | 11.73 (10.38; 13.08) |
| <b>Alcohol consumption<sup>e</sup></b> | <i>p=0.04</i>        | <i>p=0.77</i>        |
| No                                     | 10.05 (9.17; 10.93)  | 12.53 (11.65; 13.40) |
| Yes                                    | 11.93 (10.40; 13.46) | 12.79 (11.26; 14.32) |
| <b>Multimorbidity</b>                  | <i>p=0.82</i>        | <i>p=0.12</i>        |
| Up to 4 diseases                       | 10.55 (9.30; 11.80)  | 11.76 (10.51; 13.01) |
| 5 or more diseases                     | 10.36 (9.41; 11.31)  | 13.06 (12.11; 14.01) |
| <b>Depression<sup>f</sup></b>          | <i>p=0.059</i>       | <i>p=0.041</i>       |
| No                                     | 10.13 (9.36; 10.91)  | 12.28 (11.50; 13.05) |
| Yes                                    | 12.14 (10.21; 14.06) | 14.44 (12.52; 16.37) |
| <b>Polipharmacy<sup>g</sup></b>        | <i>p=0.004</i>       | <i>p=0.07</i>        |
| No                                     | 12.23 (10.86; 13.59) | 13.67 (12.30; 15.03) |
| Yes                                    | 9.77 (8.86; 10.68)   | 12.11 (11.21; 13.02) |
| <b>Body Mass Index<sup>h</sup></b>     | <i>p=0.023</i>       | <i>p=0.43</i>        |
| Low weight                             | 14.81 (11.64; 17.99) | 11.67 (8.50; 14.84)  |
| Normal                                 | 10.29 (8.96; 11.62)  | 11.94 (10.61; 13.27) |
| Overweight                             | 10.22 (9.27; 11.17)  | 12.93 (11.98; 13.88) |

<sup>a</sup> p-value obtained through adjusted linear regression including variables according to hierarchical levels: 1<sup>st</sup> Level: sex, age, skin color, marital status, economic level, education, work status; 2<sup>nd</sup> Level: diet quality, physical activity, smoking, alcohol consumption; 3<sup>rd</sup> Level: multimorbidity, depression, polypharmacy and nutritional status.

<sup>b</sup> according to *Associação Brasileira de Empresas de Pesquisa* (ABEP)[21]: category A/B indicating higher socioeconomic status;

<sup>c</sup> assessed using the Diet Quality Index for the Elderly (*Índice de Qualidade da dieta do idoso* - IDQ-I)[22];

<sup>d</sup> assessed by the International Physical Activity Questionnaire (IPAQ)[23];

<sup>e</sup> alcohol consumption in the last month;

<sup>f</sup> according to the Geriatric Depressive Scale (GDS-10)[25,26];

<sup>g</sup> continuous use of five or more medications[27];

<sup>h</sup> cutoffs recommended by Lipschitz et al[28].
